# Supplementary material
Source: PubMed Central journal article supplement (PMC4458138)

Klotz et al\_Supplementary Figure 1

1 minute

Gel ①

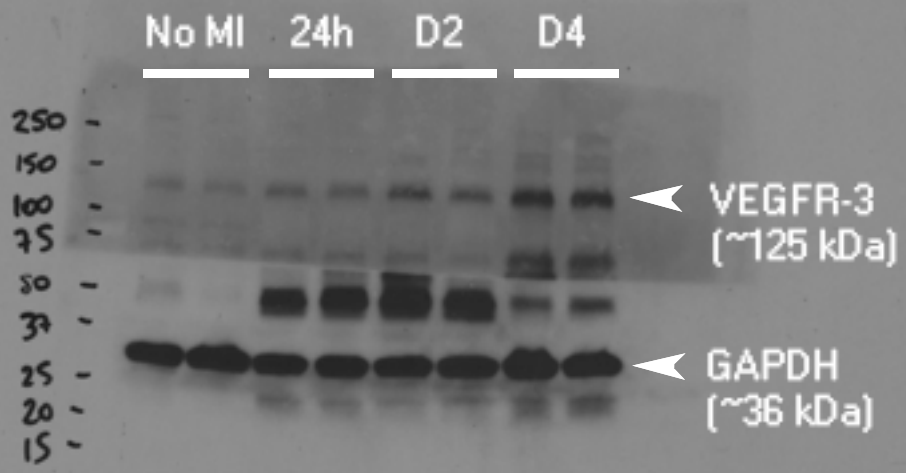

Gel ②

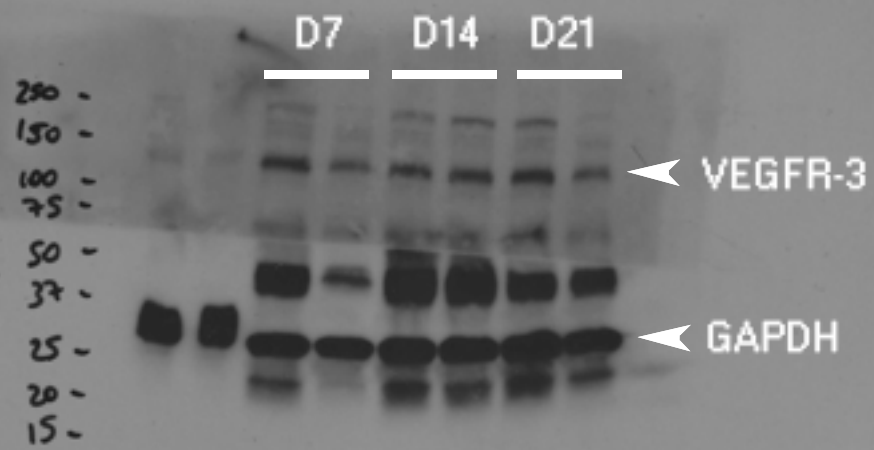

Supplement: NIHMS62965-supplement-2.pdf [file NIHMS62965-supplement-2.pdf]
